# Supplementary material for: Escherichia coli and Pseudomonas aeruginosa Isolated From Urine of Healthy Bovine Have Potential as Emerging Human and Bovine Pathogens
Source: Front Microbiol. 2022 Mar 7;13:764760. doi: 10.3389/fmicb.2022.764760 (PMC8940275; doi:10.3389/fmicb.2022.764760)
Supplement: Supplementary file 1 [file Table_1.XLSX]

## Sheet: Table S1A
Supplemental Table 1A. Bovine P. aeruginosa genome characteristics and genetic content similarity to bovine urinary isolates.
Accession Number	Strain Name	Isolation Source	Serotype	UFMG-H6	UFMG-H7	UFMG-H9	UFMG-H10
GCF_001518975.1	USDA-ARS-USMARC-41639	nasopharynx	O5	96.06	96.17	96.04	95.92
GCF_003628935.1	VET-33	milk	O5	94.72	94.85	94.71	94.62
GCF_003628945.1	VET-34	milk	O5	93.54	93.67	93.6	93.45
GCF_003628975.1	VET-54	milk	O5	91.94	92.05	91.92	91.84
GCF_003629055.1	VET-74	internal organs	O1	86.65	86.71	86.56	86.55
GCF_003629345.1	VET-41	milk	O3	94.08	94.16	94.08	93.96
GCF_003629655.1	VET-46	milk	O7	94.13	94.23	94.1	93.99
GCF_003630295.1	VET-55	milk	O6	88.35	88.47	88.29	88.25
GCF_003630365.1	VET-32	milk	O1	93.11	93.22	93.07	92.99
GCF_003630465.1	VET-42	milk	O9	94.3	94.38	94.26	94.18
GCF_003630485.1	VET-30	milk	O9	85.55	85.6	85.5	85.43
GCF_003631495.1	VET-70	milk	O6	86.54	86.66	86.48	86.46
GCF_003631515.1	VET-47	milk	O5	94.63	94.73	94.61	94.51
GCF_003632555.1	VET-123	milk	O5	89.93	90.05	89.91	89.81
GCF_003632755.1	VET-73	internal organs	O9	79.65	79.79	79.86	79.58
GCF_003632765.1	VET-60	internal organs	O11	78.57	78.67	78.78	78.51
GCF_003632775.1	VET-121	milk	O4	85.95	86.05	86.11	85.82
GCF_003633465.1	VET-124	milk	O13	88.33	88.45	88.29	88.19
GCF_003633515.1	VET-58	internal organs	O11	83.52	83.61	83.74	83.42

## Sheet: Table S1B
Supplemental Table 1B. Bovine E. coli genome characteristics and genetic content similarity to bovine urinary isolates.
Accession Number	Strain Name	Isolation Source	Serotype	Phylotype	UFMG-H6A	UFMG-H7A	UFMG-H7C	UFMG-H9	UFMG-H10
GCF_001708145.1	Ec47VL	feces	O8H9	C	89.18	89.21	82.43	88.86	89.21
GCF_001881595.2	KG-10	Vagina	H8	B1	85.66	85.67	79.28	85.31	85.66
GCF_001881605.1	KG-24	vulva	O6H49	B1	91.45	91.47	84.67	91.14	91.49
GCF_002134765.1	13B	rectal swab	O8H9	C	88.82	88.78	82.14	88.5	88.73
GCF_002993505.1	KG-13	vagina	O84H23	B1	89.87	89.87	83.24	89.54	89.89
GCF_002993515.1	KG-11	vagina	O29H21/H54	B1	90.74	90.74	83.82	90.39	90.78
GCF_002993555.1	KG-12	vagina	O125abH19	B1	91.47	91.47	84.42	91.14	91.42
GCF_002993605.1	KG-9	vagina	H23	B1	89.18	89.17	82.59	88.86	89.23
GCF_003048015.1	KG-21	vulva	O18H49	A	91.61	91.57	84.42	91.23	91.56
GCF_003048055.1	KG-19	vulva	O29H21/H54	B1	90.46	90.51	83.46	90.09	90.46
GCF_003048085.1	KG-20	vulva	O125abH19	B1	91.4	91.38	84.29	91.05	91.33
GCF_003048105.1	KG-23	vulva	H23	B1	88.98	88.96	82.39	88.66	89
GCF_003048145.1	KG-22	vulva	O4H11	B1	89	88.94	82.25	88.66	88.98
GCF_003194715.1	16VS	feces	O8H9	C	88.43	88.39	81.81	88.09	88.38
GCF_003268735.1	E54	feces	O83H42	F	79.85	79.79	73.74	79.61	79.79
GCF_003284485.1	E12	feces	O178H19	B1	91.99	91.86	85.09	91.62	91.88
GCF_004661505.1	58_3	feces	O174H21	B1	91.24	91.13	84.15	90.84	91.22
GCF_004661515.1	6_6	feces	O130H11	B1	90.39	90.35	83.37	90.07	90.37
GCF_004661535.1	115_4	feces	O171H2	B1	90.35	90.38	83.35	90	90.35
GCF_004661545.1	218_8	feces	O163H19	B1	91.01	90.99	83.82	90.73	90.94
GCF_004661595.1	175_1	feces	H10	B1	89.98	90.06	83.12	89.66	90.03
GCF_004661615.1	AP31-1	feces	O179H8	B1	91.1	91.04	84.06	90.77	91.08
GCF_004661625.1	AP32-1	feces	O185H7	B1	91.35	91.38	84.26	91.07	91.38
GCF_004661635.1	208_3	feces	H19	B1	92.57	92.57	85.4	92.19	92.57
GCF_004664245.1	26-1	feces	O2H25	cryptic	68.87	68.8	63.46	68.59	68.9
GCF_004664385.1	211_1	feces	O74H42	B1	92.09	92.11	84.89	91.75	92.09
GCF_004664415.1	5-1-1	feces	O91H21	B1	91.58	91.59	84.58	91.25	91.56
GCF_004664425.1	FO130	feces	O91H21	B1	91.74	91.7	84.73	91.41	91.72
GCF_004664435.1	47-1-1	feces	O91H21	B1	91.67	91.61	84.69	91.3	91.65
GCF_004664455.1	AP16-1	feces	O91H21	B1	92.29	92.3	85.29	91.96	92.27
GCF_004664495.1	V07-4-4	feces	O91H21	B1	91.7	91.66	84.67	91.37	91.68
GCF_004664515.1	348_3	feces	O134H38	B1	90.92	90.9	84.02	90.62	90.85
GCF_004664585.1	116-1	feces	O178H19	B1	93.25	93.17	86.08	92.85	93.21
GCF_004664605.1	45-2-4	feces	O8H19	B1	90.67	90.67	83.75	90.36	90.65
GCF_004664665.1	365-1	feces	O116H21	B1	90.87	90.9	83.97	90.52	90.88
GCF_016103185.1	RA-13	unknown	O130H11	B1	88.59	88.55	81.9	88.27	88.59
GCF_017312825.1	KG-54	vulva	O88H25	B1	89.84	89.81	83.06	89.5	89.8
GCF_017312845.1	KG-53	vulva	H7	B1	89	89.01	82.39	88.68	89.02
GCF_017312855.1	KG-55	vagina	O8H28	B1	87.37	87.34	80.82	87.04	87.31
GCF_017312925.1	KG-52	vulva	O29H21/H54	B1	89.91	89.85	83.01	89.5	89.87
GCF_017312965.1	KG-45	vagina	O6H49	B1	90.48	90.4	83.57	90.09	90.42
GCF_017312985.1	KG-49	vulva	H8	B1	88.38	88.37	81.76	88.09	88.36
GCF_017313025.1	KG-46	vagina	O170H8	B1	89.71	89.71	82.99	89.38	89.73
GCF_017313145.1	KG-50	vulva	O150H8	B1	90.74	90.7	83.95	90.41	90.69
GCF_017313175.1	KG-60	vagina	H25	B1	79.71	79.68	73.67	79.45	79.69
GCF_020443995.1	438/99	rectal swab	O157H7	E	81.82	81.81	75.21	81.59	81.82
